# Supplementary material for: Spatial Structure and Climatic Adaptation in African Maize Revealed by Surveying SNP Diversity in Relation to Global Breeding and Landrace Panels
Source: PLOS journal article supplement (doi:10.1371/journal.pone.0047832), 2012-10-16
Supplement: S2 (10.1371/journal.pone.0047832.s002) [file journal.pone.0047832.s002]

**Figure S2**

a)

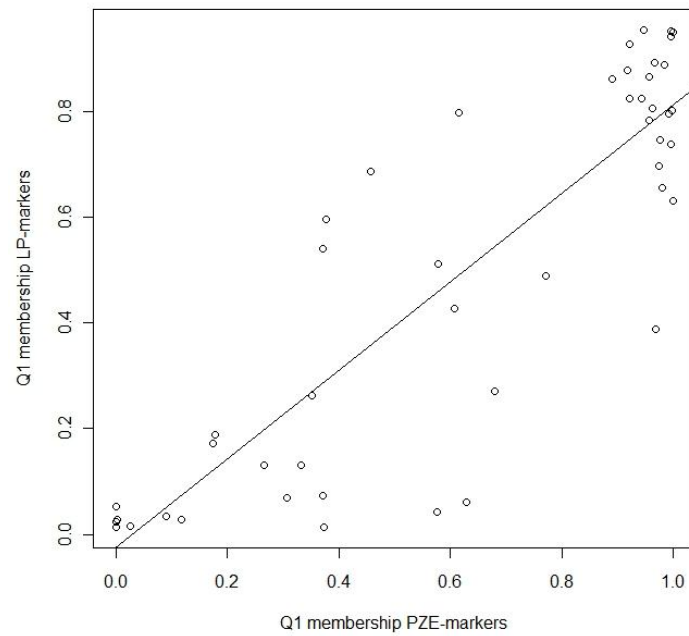

$R^2=0.87$  ( $p<0.01$ )

b)

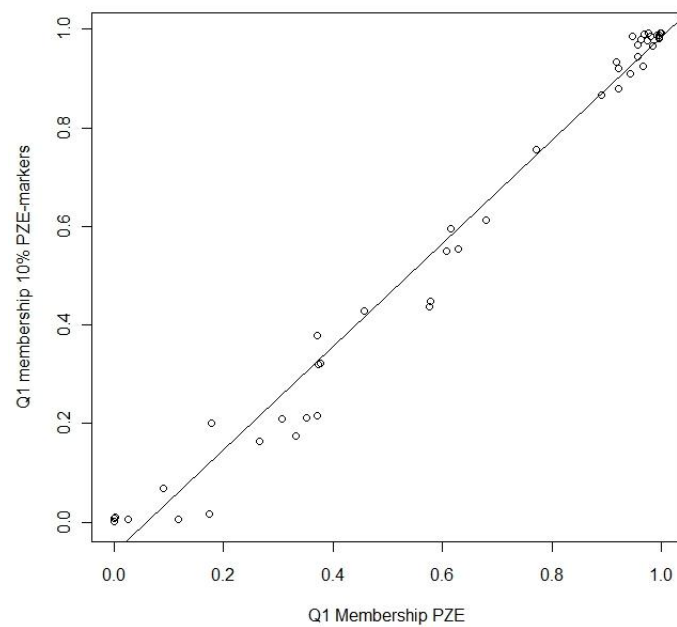

$R^2=0.99$  ( $p<0.01$ )

c)

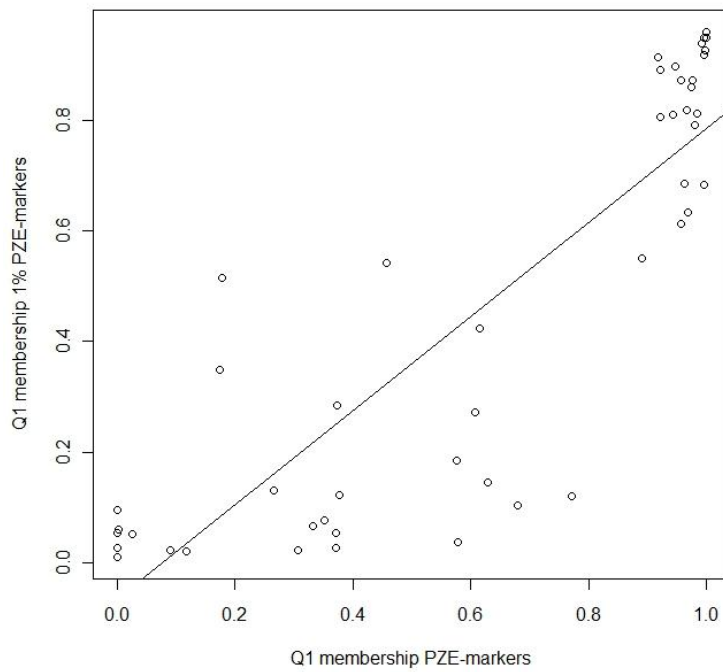

$R^2=0.86$  ( $p<0.01$ )

d)

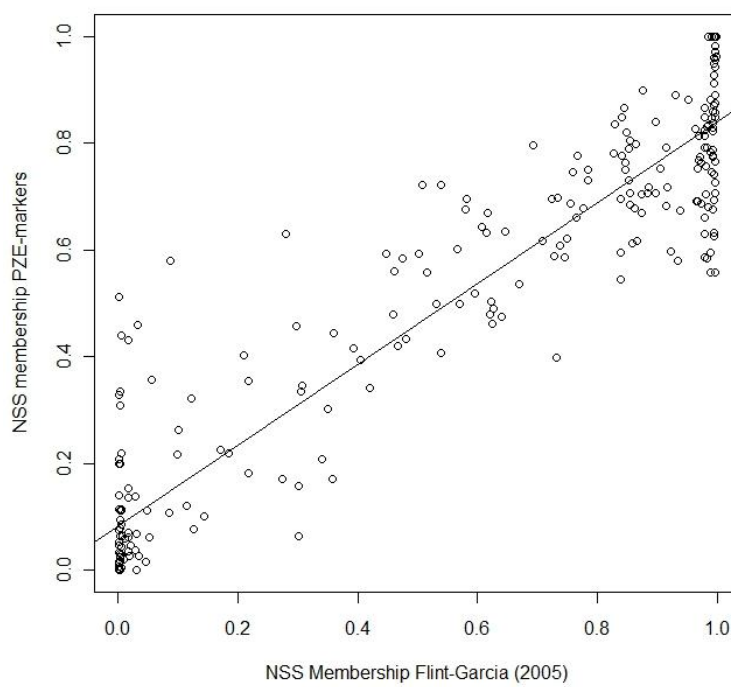

$R^2=0.94$  ( $p<0.01$ )

e)

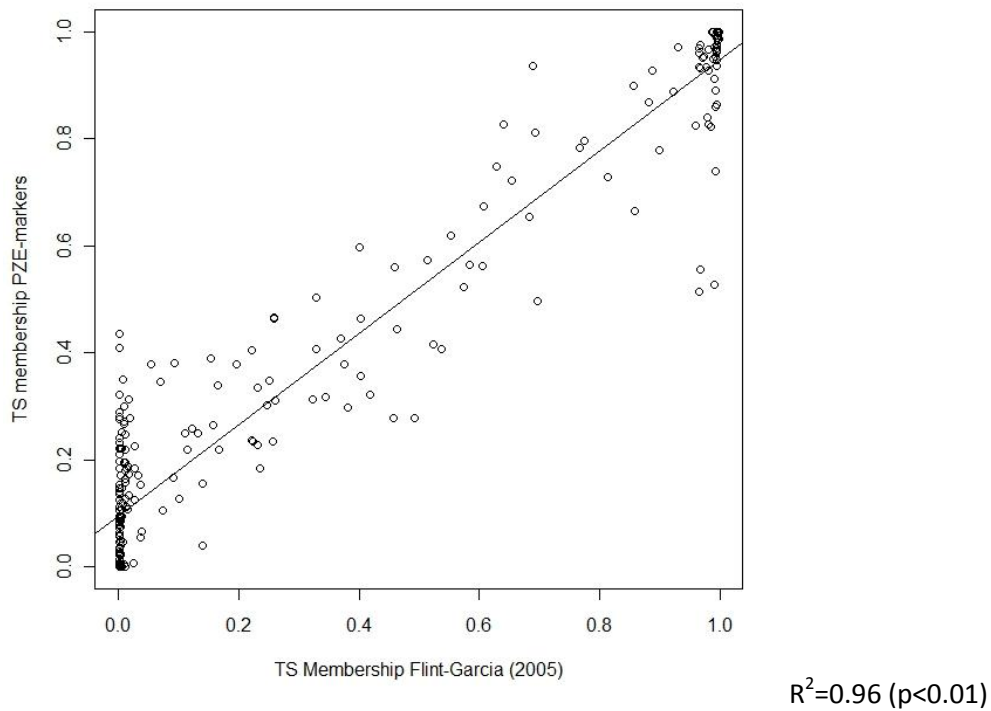

**Fig. S2** Plots of the relationship of Q group membership from different STRUCTURE (Pritchard et al. 2000) analyses: a, b, c) Between Q group membership in cluster 1 (Eastern) in the African panel for the full 26,900 Panzea markers and the Landrace Panel markers, the 10% subset and the 1% subset of the Panzea markers, respectively; d, e) Between accessions in the NSS and TS clusters identified in the Association Panel in Flint-Garcia et al. (2005) vs. the corresponding Q group memberships from our analysis based on 26,900 Panzea markers (PZE-prefix). The correlation coefficient (Pearson's  $R^2$ ) is given for all plots.
