# Supplementary material for: Spatial Structure and Climatic Adaptation in African Maize Revealed by Surveying SNP Diversity in Relation to Global Breeding and Landrace Panels
Source: PLOS journal article supplement (doi:10.1371/journal.pone.0047832), 2012-10-16

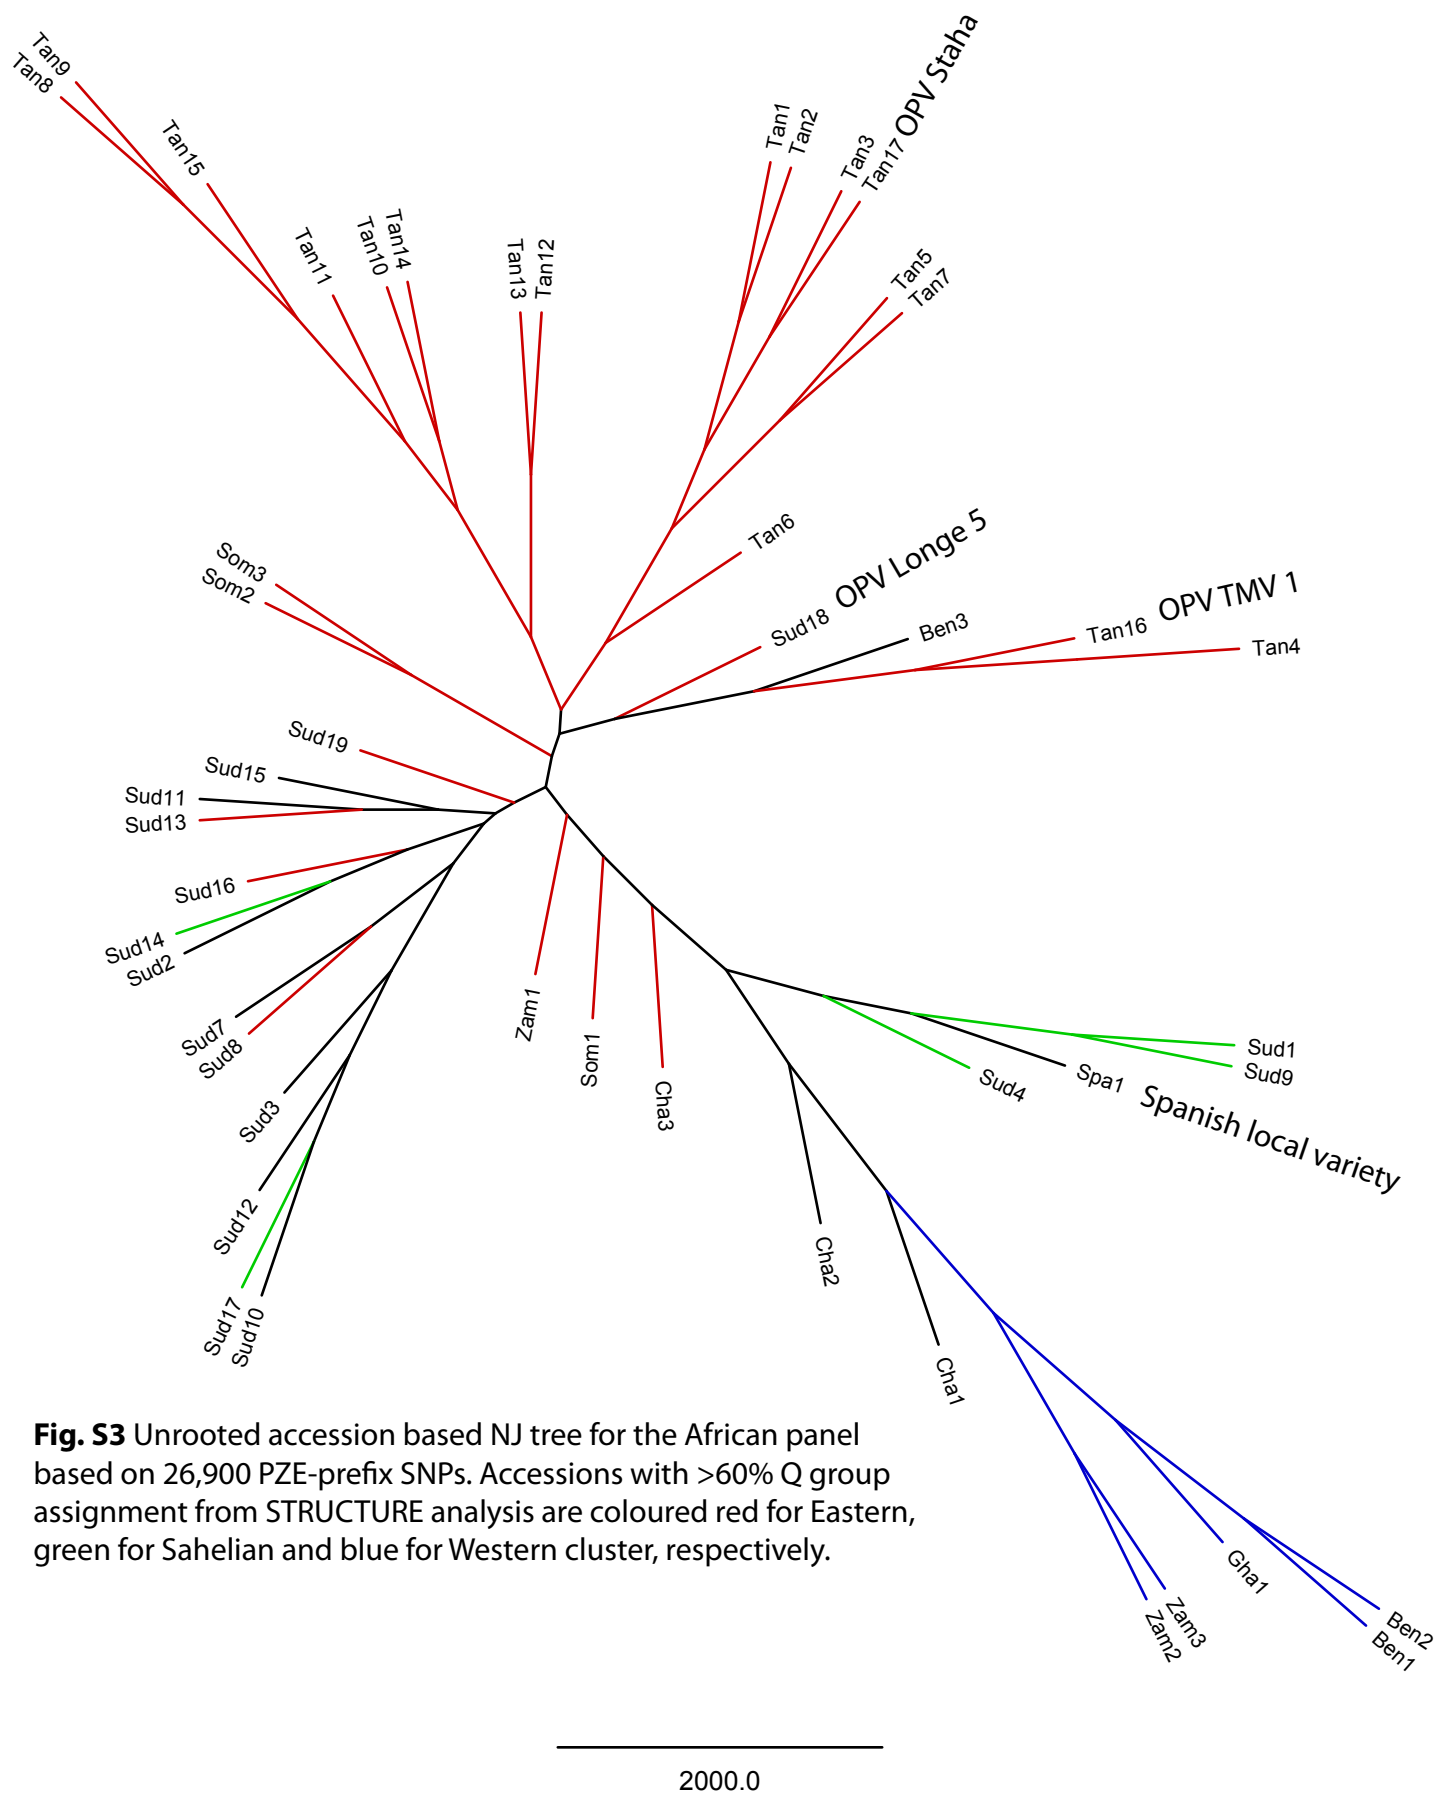

Supplement: S3 (10.1371/journal.pone.0047832.s003) [file journal.pone.0047832.s003]
