# Supplementary material for: Spatial Structure and Climatic Adaptation in African Maize Revealed by Surveying SNP Diversity in Relation to Global Breeding and Landrace Panels
Source: PLOS journal article supplement (doi:10.1371/journal.pone.0047832), 2012-10-16
Supplement: S4 (10.1371/journal.pone.0047832.s004) [file journal.pone.0047832.s004]

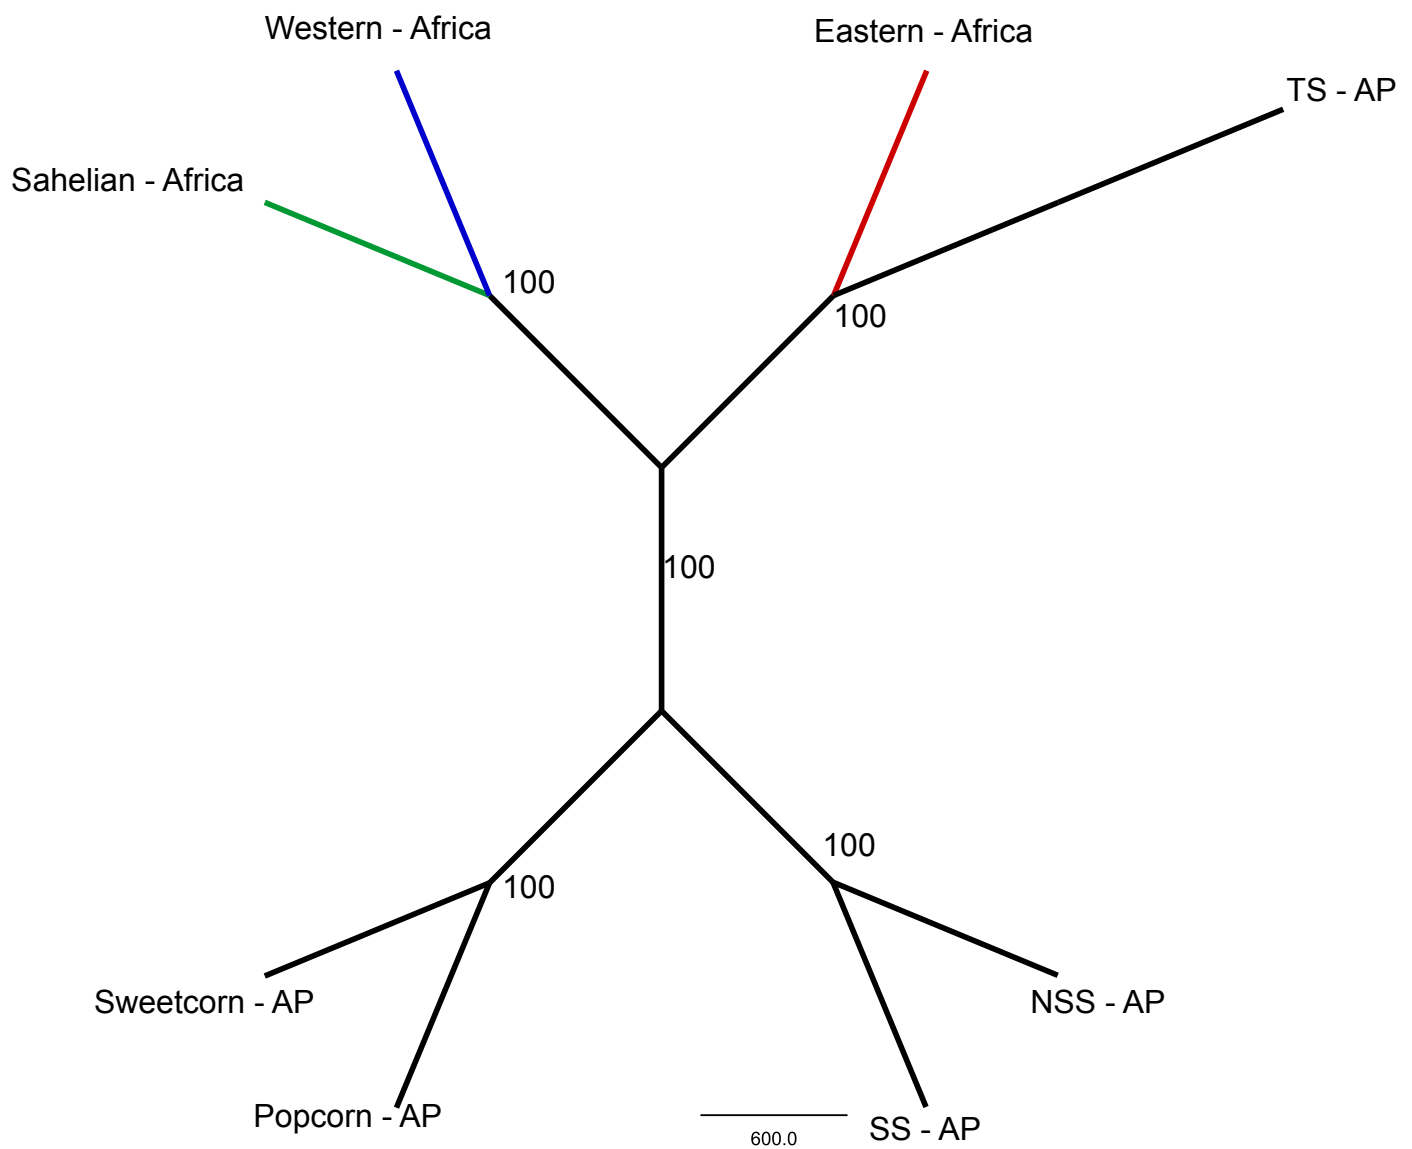

**Fig. S4** Unrooted NJ tree of the combined African and Association panel dataset based on 26,900 PZE-prefix SNPs. The tree is based on clusters defined by STRUCTURE analysis of the Association Panel (Flint-Garcia *et al.* 2005) and the African panel (including only accessions with >60% assignment to a Q group and 20 randomly selected lines representing the larger clusters). Bootstrap values in % from 1000 replications.
