# Supplementary material for: Spatial Structure and Climatic Adaptation in African Maize Revealed by Surveying SNP Diversity in Relation to Global Breeding and Landrace Panels
Source: PLOS journal article supplement (doi:10.1371/journal.pone.0047832), 2012-10-16
Supplement: S5 (10.1371/journal.pone.0047832.s005) [file journal.pone.0047832.s005]

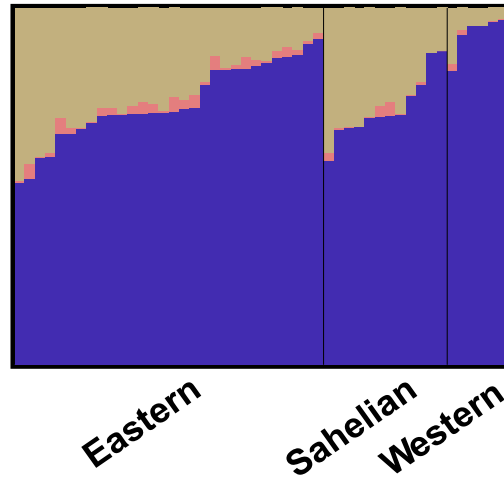

**Fig. S5.** Assignment probabilities for K=3 (TS (blue), NSS (grey), SS (pink)) in the combined African and Association Panel applied on clusters defined by K=3 in the African Panel alone.
