# Supplementary material for: Spatial Structure and Climatic Adaptation in African Maize Revealed by Surveying SNP Diversity in Relation to Global Breeding and Landrace Panels
Source: PLOS journal article supplement (doi:10.1371/journal.pone.0047832), 2012-10-16
Supplement: S6 (10.1371/journal.pone.0047832.s006) [file journal.pone.0047832.s006]

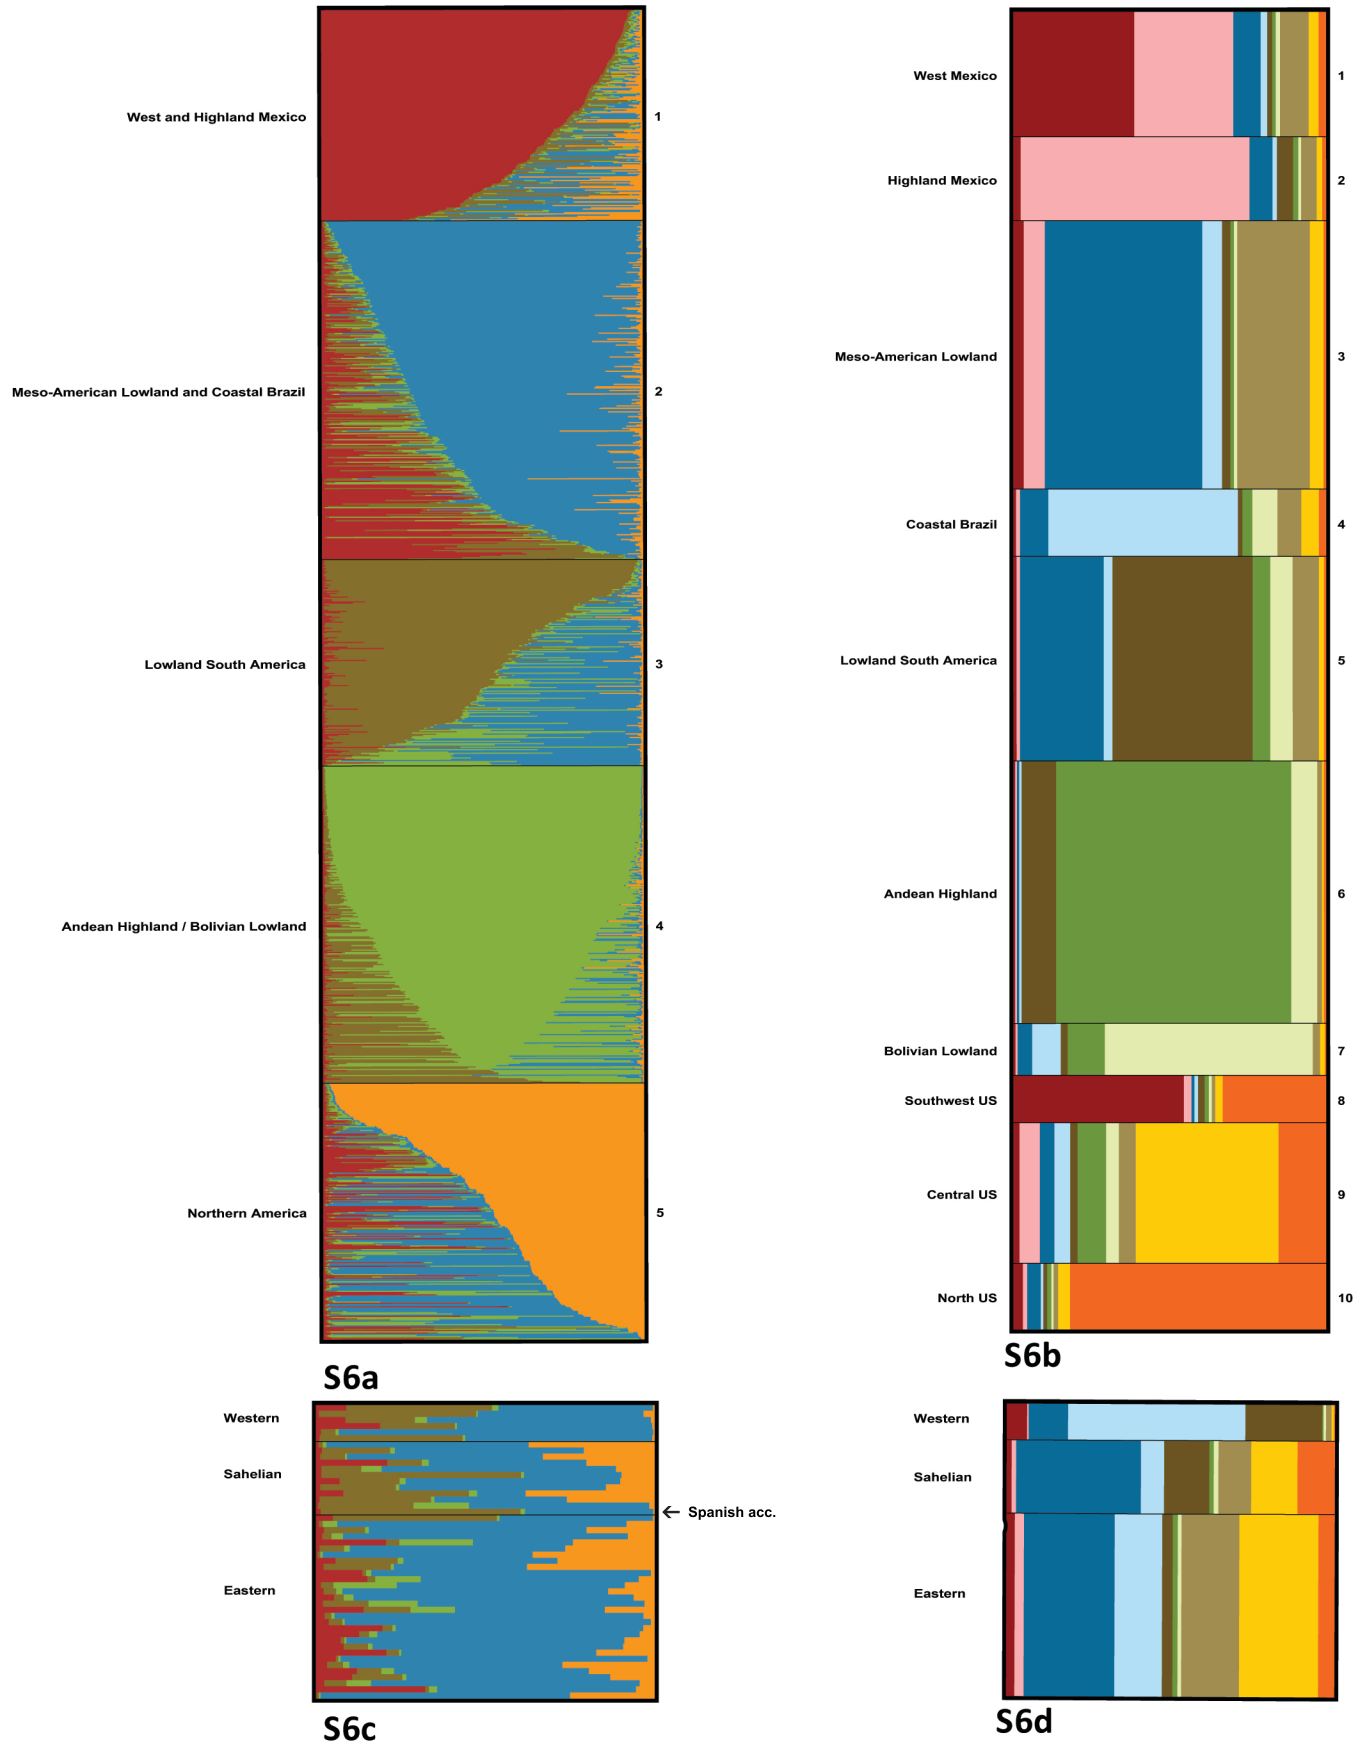

**Fig. S6** Population structure in the African panel and Landrace panel (LP) (van Heerwaarden et al. 2011) defined by STRUCTURE. a) Population structure in the combined dataset for  $K=5$  (Each line represents one accession); b) Population structure in the combined dataset for  $K=10$  (The named geographic groups are identified and named by PCA analysis in van Heerwaarden et al. (2011) and the Q groups membership is averaged within geographic group); c) Population structure in the African panel for  $K=5$  (The three named clusters are defined by STRUCTURE analysis of the African samples alone); d) Population structure in the African panel for  $K=10$  applied on the three clusters identified in African panel. Visualization was done by DISTRUCT v1.1 (Rosenberg 2004).
